Harbor/UCLA Medical Center  
1000 West Carson Street  
Torrance, California 90509

## REFERENCES

1. Sebel PS, Lowdon JD: Propofol: A new intravenous anesthetic. *ANESTHESIOLOGY* 71:260-277, 1989

Anesthesiology  
72:396, 1990

*In Reply:*—We agree with Dr. Van Aken that the reports on the cardiovascular system are conflicting, and we agree with all three letters that anesthesia with propofol can be associated with marked reductions in cardiac output, a finding generally supported by much of the literature published since our review was written.

Drs. Merin and Van Aken raise an interesting point when they suggest that in the studies where cardiac output is not affected, there is significant respiratory acidosis. In the study by Claeys *et al.*,<sup>1</sup> although the pH fell from 7.38 to 7.30 (mean), the arterial P<sub>CO<sub>2</sub></sub> increased from 38 mmHg to only 42 mmHg (mean) while the subjects were breathing room air. On the other hand, and as Dr. Merin states, Stephan *et al.*<sup>2</sup> found that hypercarbia resulted in no depression of cardiac output compared with awake controls, while normocarbia and hypocarbia resulted in significant (15%) decreases in cardiac output. While respiratory status is undoubtedly one factor modifying the cardiovascular effects of propofol, other factors such as pre-existing disease state and medications, intravascular volume status, and other anesthetics are also relevant. For example, nitrous oxide is known to cause cardiovascular depression in combination with other anesthetics,<sup>3</sup> although this has been shown not to be an important effect following a single induction dose of propofol.<sup>4</sup>

Most authors agree that propofol has a vasodilating effect and that systemic vascular resistance (SVR) is decreased,<sup>5,6,\*</sup> although Van Aken's group found major effects on cardiac output and stroke volume but only minor effects on SVR<sup>7</sup> or an increase in SVR with intubation.<sup>4</sup> Lepage *et al.*<sup>8</sup> also found the reduction in arterial pressure following propofol alone to be related entirely to a decrease in cardiac index and preload, with SVR remaining unchanged. In an open-chested pig model, propofol was found to produce a dose-related decrease in myocardial contractility associated with an increase in SVR.<sup>9</sup> There appears to be no way to reconcile these different findings. Similar anesthetic protocols have been used, generally resulting in a decrease in SVR, yet in a limited number of studies, SVR is unchanged or increased.

Both Van Aken and Lippmann and Mok comment on our statement that "propofol in combination with an opioid may constitute safer practice and offer more effective blunting of autonomic sympathetic responses." This statement related to the study of Stephan *et al.*<sup>6</sup> in which myocardial lactate production was found using propofol alone but when fentanyl was added and surgery was started, myocardial blood flow, arterial pressure, and heart rate returned towards baseline. These results were confounded by surgical stimulation. The recent data of Van Aken *et al.*<sup>7</sup> and Lepage *et al.*<sup>8</sup> suggest that the addition of fentanyl to either a bolus dose or an infusion of propofol results in deleterious cardiovascular effects.

In summary, although the circumstances under which SVR and cardiac output are affected remain to be fully elucidated, a marked de-

2. Williams JP, McArthur JD, Walker WE, Teunissen E, Rietsema K, Stanley TH: The cardiovascular effects of propofol in patients with impaired cardiac function (abstract). *Anesth Analg* 65:S166, 1986
3. Vermeyen KM, Erpels FA, Janssen LA, Beeckman CP, Hanegreefs GH: Propofol-fentanyl anaesthesia for coronary bypass surgery in patients with good left ventricular function. *Br J Anaesth* 58: 1115-1120, 1987

(Accepted for publication November 16, 1989.)

crease in arterial pressure is a universal finding after induction with propofol. The cardiovascular effects of this drug are, as the authors of the three letters point out, more pronounced than those following the usual iv anesthetic agents.

PETER S. SEBEL, M.B., B.S., PH.D., F.F.A.R.C.S.I.  
Associate Professor of Anesthesiology  
Director of Clinical Investigations

JANE D. LOWDON, M.D.  
Assistant Professor of Anesthesiology  
Department of Anesthesiology  
Emory University School of Medicine  
1364 Clifton Road, N.E.  
Atlanta, Georgia 30322

## REFERENCES

1. Claeys MA, Gepts E, Camu F: Haemodynamic changes during anaesthesia induced and maintained with propofol. *Br J Anaesth* 60:3-9, 1988
2. Stephan H, Sonntag H, Schenk HD, Kolhausen S: Effects of Diprivan on cerebral blood flow, cerebral oxygen consumption, and cerebral vascular reactivity. *Anaesthesist* 36:60-65, 1987
3. Eisele JH: The cardiovascular effects of N<sub>2</sub>O, Nitrous Oxide. Edited by Eger EI II. London, Edward Arnold, 1985, pp 125-156
4. Carlier S, Van Aken H, Vandermeersch E, Thorniley A, Byttebier G: Does N<sub>2</sub>O affect the hemodynamic effects of anesthesia induction with propofol? *Anesth Analg* 68:728-733, 1989
5. Patrick MR, Blair IJ, Feneck RO, Sebel PS: A comparison of the haemodynamic effects of propofol ('Diprivan') and thiopentone in patients with coronary artery disease. *Postgrad Med J* 61: 23-27, 1985
6. Stephan H, Sonntag H, Schenk HD, Kettler D, Khambatta HJ: Effects of propofol on cardiovascular dynamics, myocardial blood flow, and myocardial metabolism in patients with coronary artery disease. *Br J Anaesth* 58:969-975, 1986
7. Van Aken H, Meinshausen E, Prien T, Brussel T, Heinecke A, Lawin P: The influence of fentanyl and tracheal intubation on the hemodynamic effects of anesthesia induction with propofol/N<sub>2</sub>O in humans. *ANESTHESIOLOGY* 68:157-163, 1988
8. Lepage J-YM, Pinaud ML, Helias JH, Juge CM, Cozian AY, Farinotti R, Souron RJ: Left ventricular function during propofol and fentanyl anesthesia in patients with coronary artery disease. Assessment with a radionuclide approach. *Anesth Analg* 67: 949-955, 1988
9. Coetzee A, Fourie P, Coetzee J, Badenhorst E, Rebel A, Bolliger C, Uebel R, Wium C, Lombard C: Effect of various propofol plasma concentrations on regional myocardial contractility and left ventricular afterload. *Anesth Analg* 69:573-583, 1989

(Accepted for publication November 16, 1989.)

\* Kaplan JA, Guffin AV, Mikula S, Dolman J, Profeta J: Comparative hemodynamic effects of propofol and thiamylal sodium during anesthetic induction for myocardial revascularization. *Journal of Cardiothoracic Anesthesia* 3:297-302, 1988.
